# Supplementary material for: Enhanced electrochemical properties of cerium metal–organic framework based composite electrodes for high-performance supercapacitor application
Source: Royal Society of Chemistry journal article supplement (doi:10.1039/c7ra12789h), 2018-01-01
Supplement: c7ra12789h1.pdf [file c7ra12789h1.pdf]

## **Enhanced electrochemical properties of cerium metal-organic framework based composite electrodes for high-performance supercapacitor application**

Rajendran Ramachandran<sup>a,b</sup>, Wenlu Xuan<sup>a</sup>, Changhui Zhao<sup>a,b</sup>, Xiaohui Leng<sup>a,b</sup>, Dazhi Sun<sup>c</sup>, Dan Luo<sup>a</sup>, and Fei Wang<sup>a,b,d\*</sup>

*<sup>a</sup>Department of Electronic and Electrical Engineering, Southern University of Science and Technology, Shenzhen 518055, China.*

*<sup>b</sup>Shenzhen Key Laboratory of 3rd Generation Semiconductor Devices, Shenzhen 518055, China.*

*<sup>c</sup>Department of Materials Science and Engineering, Southern University of Science and Technology, Shenzhen 518055, China.*

*<sup>d</sup> State Key Laboratories of Transducer Technology, Shanghai Institute of Microsystem and Information Technology, Chinese Academy of Sciences, Shanghai 200050, China.*

\* To whom correspondence should be addressed:

E-mail: [wangf@sustc.edu.cn](mailto:wangf@sustc.edu.cn), Tel: (+86) 755-88018509

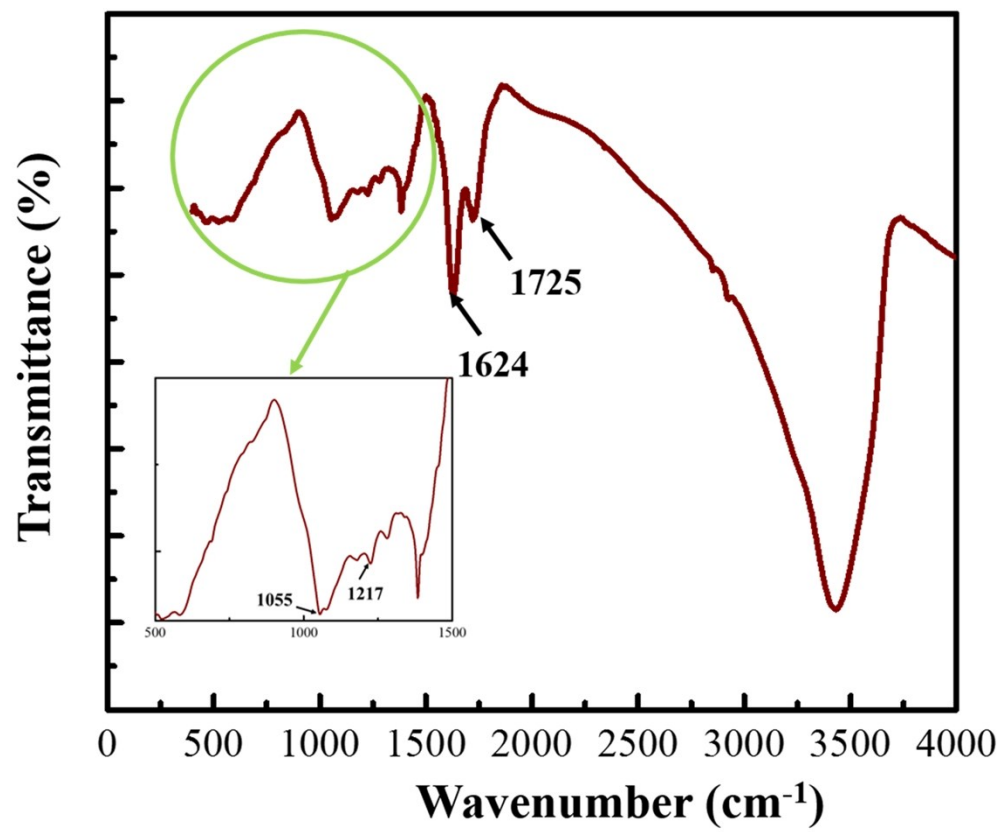

Fig. S1. FTIR spectrum of Graphene oxide

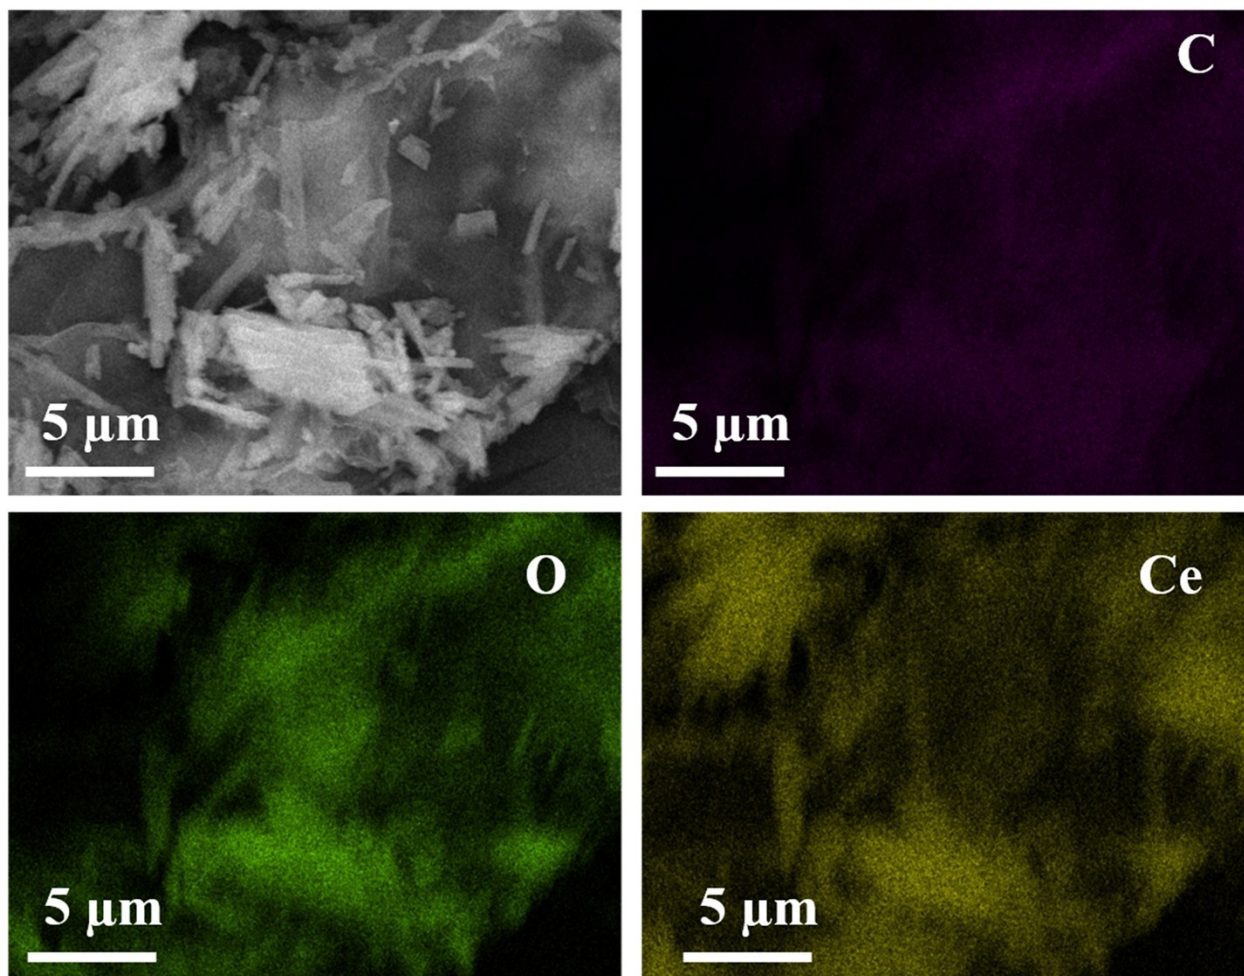

**Fig. S2.** EDS mapping images of Ce-MOF/GO composite

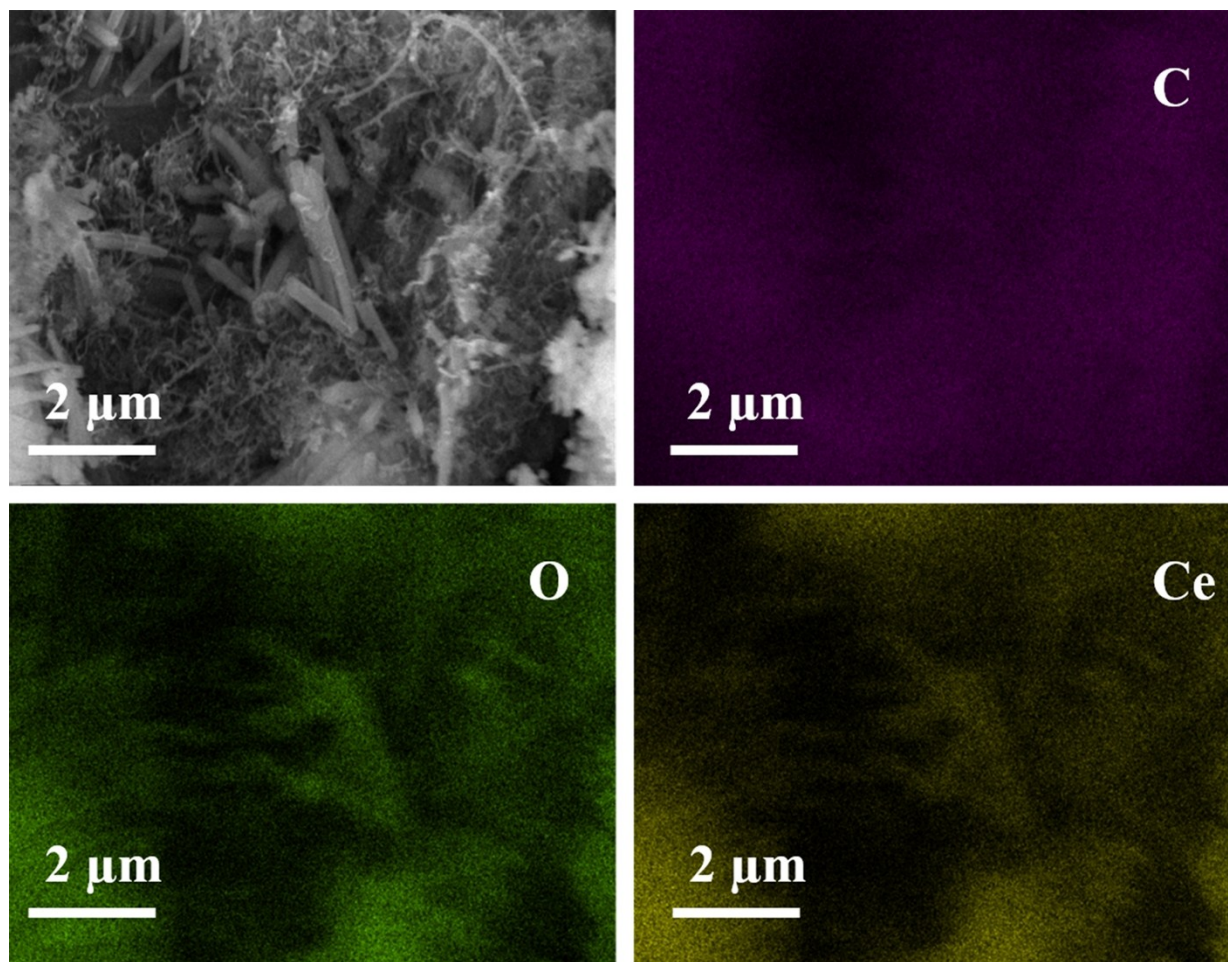

**Fig. S3.** EDS mapping images of Ce-MOF/CNT composite

**Before 5000 cycles**

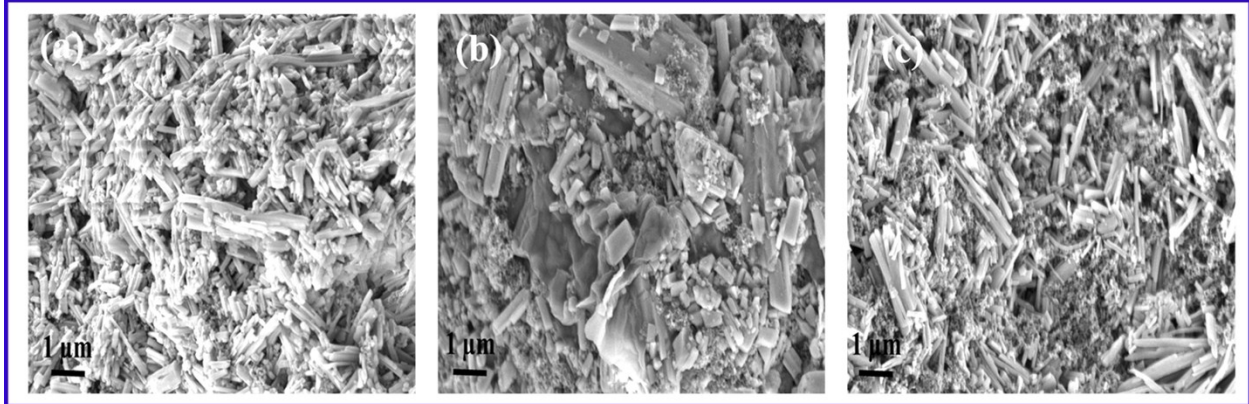

**After 5000 cycles**

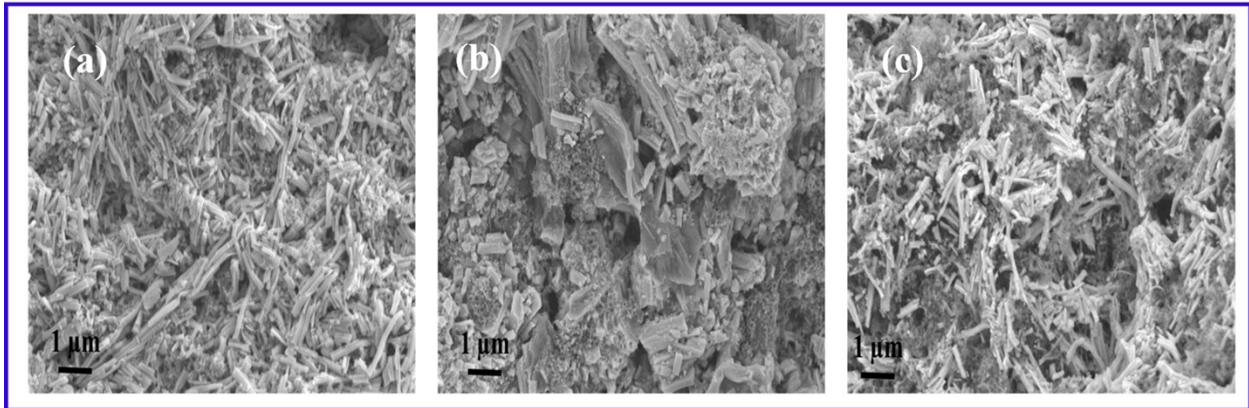

**Fig. S4.** SEM images of electrodes before and after 5000 cycles in 3M KOH electrolyte (a) Ce-MOF (b) Ce-MOF/GO and (c) Ce-MOF/CNT.
